# Supplementary material for: Photopolymerizing carbazole-based monomers in dilute media: prototyping organic wires with nanoscale thickness control
Source: Royal Society of Chemistry journal article supplement (doi:10.1039/d5cp03995a), 2025-12-16
Supplement: d5cp03995a1.pdf [file d5cp03995a1.pdf]

## Supporting Information

# Photopolymerizing carbazole-based monomers in dilute media: prototyping organic wires with nanoscale thickness control.

Jennifer Calderon-Mora<sup>a</sup>, Ali Dabbous<sup>a</sup>, Baptiste Maillot<sup>a</sup>, Rasta Ghasemi<sup>a</sup>, Jean Frédéric Audibert<sup>a</sup>, Fabien Miomandre<sup>a\*</sup>, Vitor Brasiliense<sup>a\*</sup>

## S1) Absorption Spectra of Rhodamine and Rhodamine dyads

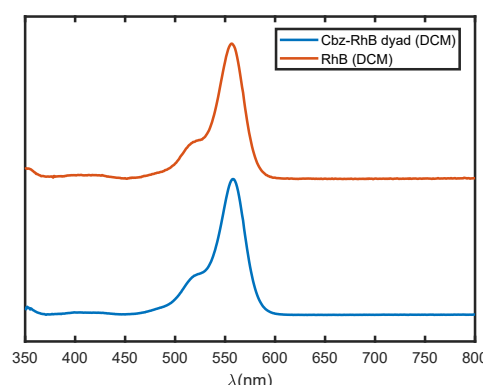

Figure S1.1 Comparison of the absorption spectra of Cbz-RhB dyads and RhB solutions.

## S2) Infrared Vibrational analysis of photografted layers

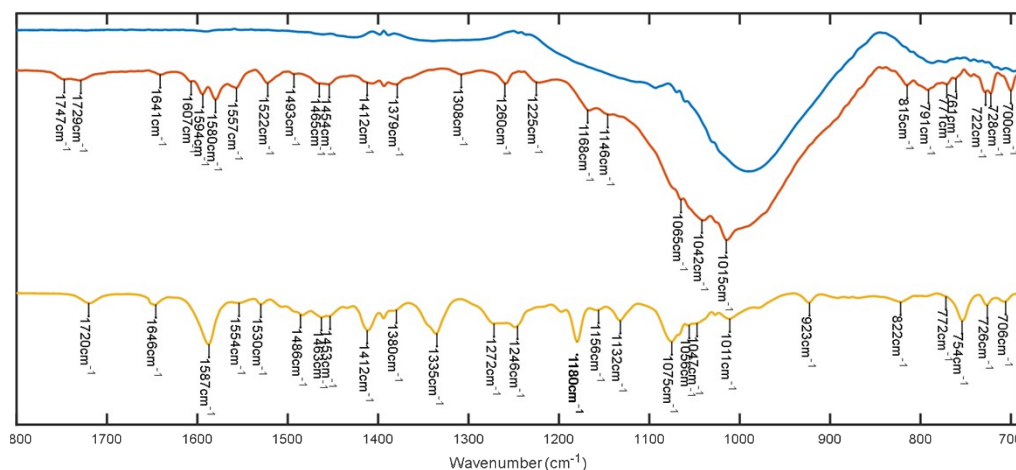

Figure S2.1 Infrared spectrum of the photopolymerized pCbz-RhB grid (orange), compared to the background IR of a ITO layer (blue). The data, also reported in Fig.3A, is showcased here at larger scale, enabling better identification of the observed vibrational band. Infrared spectra of the monomeric dyad powder is also shown, confirming the identity of the polymerized layer and facilitating band assignment (yellow)

The global IR spectrum, collected from grid samples as described in the main text and reported in Fig.3A, is reproduced here at larger scale, enabling a more careful examination of its characteristic bands. We also compare the resulting spectrum with a powder IR spectrum of dyad molecules, showing that analogue bands can be found for almost all vibrations. The positions of the main detected bands are indicated in the image, while the discussion that follows provides a tentative band

assignment based on characteristic group vibration frequencies and literature data. Unambiguous band assignment of several of the discussed modes is difficult without extra experiments, however comparison with reported characteristic vibrational modes of carbazole, rhodamines and related compounds is possible. Additionally, the IR spectra of photopolymerized layer and the dyad in the crystalline state can be readily compared, clearly demonstrating that both moieties remain intact on the final photopolymerized material.

Noteworthy, since there the quantity of material on the surface is small, the bands are not very intense, which, associated to the complexity of the material, casts difficulties onto the band assignment process. Yet, a tentative band assignment is still provided in the table below, based on the following discussion.

**Carbonyl Stretching ( $\nu$ ) modes (Region 1700-1800  $\text{cm}^{-1}$ ).** The region between 1700 and 1800  $\text{cm}^{-1}$  contains very characteristic C=O stretching modes<sup>[1]</sup>. The presence of bands in this region is expected due to the ester function present in the RhB bands. As indicated in Fig.S6.2, two bands are indeed observed, at 1729 and 1747  $\text{cm}^{-1}$  the region, suggesting two chemical environments are present.

**C-O Stretching modes.** Following the identification of C=O bands in the 1700-1800  $\text{cm}^{-1}$  range, we also expect to observe C-O stretching modes from the ester moiety, which usually arise in the 1000-1300  $\text{cm}^{-1}$  range<sup>[1]</sup>. Compared to their C=O stretching counterparts, their presence is however more delicate to assign, as several other frequencies are present in the same region. On the basis of frequent observation of saturated esters in the 1163-1210  $\text{cm}^{-1}$  region<sup>[1]</sup>, we tentatively assign the 1168  $\text{cm}^{-1}$  band to this vibration. It must be noted that  $\nu(\text{C-O})$  modes has alternatively been assigned to the 1225  $\text{cm}^{-1}$  band due to the presence of 1242  $\text{cm}^{-1}$  band<sup>[2]</sup>

**In plane C-H bending ( $\delta$ ) modes (1000-1300  $\text{cm}^{-1}$ )** Similarly to the C-H vibration on the 700-850  $\text{cm}^{-1}$  region (see below), polymerization of carbazole moieties is expected to be accompanied by decrease of signals associated to bending  $\delta_{\text{IP}}$  (C-H) modes associated to 1,2 disubstituted rings, usually observed in the 1040-1080  $\text{cm}^{-1}$  and 1100-1150  $\text{cm}^{-1}$  regions<sup>[6]</sup>. As shown in Fig.S2.1 we in the monomeric dyad we observe two weak modes at 1047-1056  $\text{cm}^{-1}$ , a stronger mode at 1075  $\text{cm}^{-1}$  and a band at 1132  $\text{cm}^{-1}$ . After polymerization, the bands at 1047-1056  $\text{cm}^{-1}$  can still be detected at 1042  $\text{cm}^{-1}$ , while the strong band at 1075 and 1132 are strongly depleted. Based on these observations, the 1047  $\text{cm}^{-1}$  is assigned to  $\delta_{\text{IP}}(\text{C-H})$  on RhB external ring, while the 1075 and 1132, weak or absent in the poly(Cbz-RhB), are assigned to Cbz in plane bending modes.

**Aromatic Ring stretching and deformation (1300-1650  $\text{cm}^{-1}$ )** Vibration bands associated to aromatic C-N stretching expected from Rhodamines tertiary amines functions are usually present in the 1310-1360  $\text{cm}^{-1}$  range<sup>[1]</sup>. The range is reasonably compatible with the band observed at 1308  $\text{cm}^{-1}$ , which is observed at 1305  $\text{cm}^{-1}$  in solid Rhodamine samples<sup>[2]</sup>, and has alternatively been assigned to C-H deformation modes at the non-xanthenic ring<sup>[2]</sup>. Interestingly in the powder samples we rather observe a large band covering 1322-1361  $\text{cm}^{-1}$ . Bands associated with C=C and C=N stretching due to ring deformation are observed in carbazoles at 1380  $\text{cm}^{-1}$  and 1452  $\text{cm}^{-1}$ <sup>[3,4]</sup>, also observed in the poly(Cbz-RhB) at 1379 and 1454  $\text{cm}^{-1}$  and in the monomeric dyad at 1380 and 1453  $\text{cm}^{-1}$ . The first vibration appears at a similar frequency as symmetric deformations modes of pyrrole rings at 1384  $\text{cm}^{-1}$ <sup>[5]</sup>, suggesting a similar deformation mode is observed here for the Cbz moieties. Analogies with other pyrrole ring deformations are also possible, such as antisymmetric ring deformation, observed at 1530

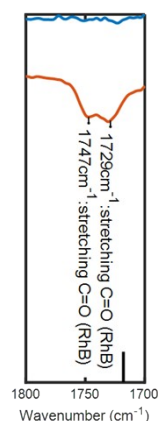

Figure S2.2 Focus on the 1700-1800 region. The bottom dark line indicates the position of the vibration on solid rhodamine samples<sup>[2]</sup>

$\text{cm}^{-1}$  for pyrroles<sup>[5]</sup>, at  $1520\text{--}1540\text{ cm}^{-1}$  for solid carbazoles<sup>[3,4]</sup>, which are also present at  $1530\text{ cm}^{-1}$  in the monomeric dyads and at  $1522\text{ cm}^{-1}$  for the polymeric layer.

Remaining bands are observed at  $1493\text{ cm}^{-1}$  and  $1465\text{ cm}^{-1}$ . The  $1493\text{ cm}^{-1}$  band is consistent with  $1490\text{ cm}^{-1}$  modes for carbazoles<sup>[3,4]</sup>, and also observed in the dyad monomers at  $1493\text{ cm}^{-1}$ . Due to the frequency region, characteristic of C=C stretching due to ring deformation, we broadly assign this band to deformation modes of the carbazoles moieties. The  $1465\text{ cm}^{-1}$  band is present at the monomeric dyad at  $1463\text{ cm}^{-1}$ . Similar bands are observed for Rhodamine solid samples, at  $1463\text{ cm}^{-1}$ <sup>[2]</sup>. This band is difficult to assign with certainty, as scissoring modes of aliphatic  $\text{CH}_2$  moieties (present in the Rhodamines Xanthene ring substituents) typically appear in this frequency<sup>[1]</sup> but it could alternatively be assigned to ring deformation modes.

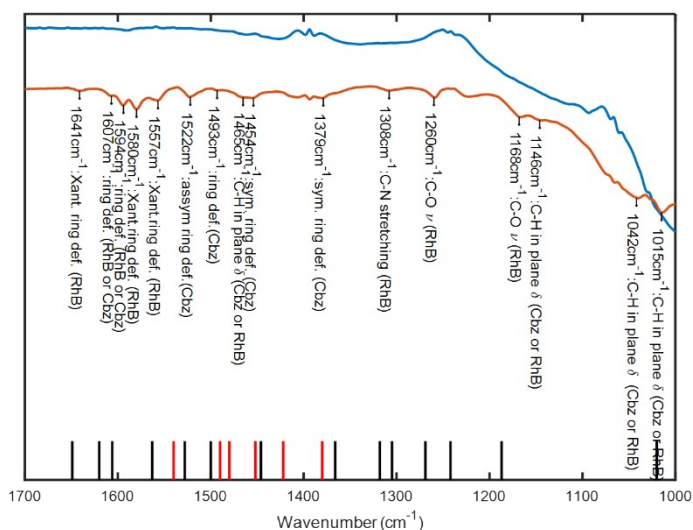

Figure S2.3 Focus on the  $1000\text{--}1650\text{ cm}^{-1}$  region, indicating main observed vibrations, along with band assignment propositions. The bottom lines indicate Rhodamine and Carbazole vibration modes based on literature [2,4].

Finally, the band present at  $1461\text{ cm}^{-1}$  on poly(Cbz-RhB), also observed at  $1646\text{ cm}^{-1}$  on the monomeric dyad, is observed at solid Rhodamines at  $1649\text{ cm}^{-1}$ <sup>[2]</sup>. It is assigned to modes associated with deformations of the xanthene ring, in analogy with anthracene modes observed at  $1620\text{--}1640\text{ cm}^{-1}$ <sup>[6]</sup>.

**Out of plane C-H bending modes (Region  $700\text{--}850\text{ cm}^{-1}$ )**. The low wavenumber region, between  $700$  and  $850\text{ cm}^{-1}$ , is usually dominated by C-H out of plane bending modes of aromatic rings, although some ring deformation modes can also appear in this region. Bands in this range are usually characteristic of the number of adjacent C-H bonds leading to characteristic vibration modes, enabling tentative assignments as indicated below.

As indicated in Fig. S2.4, the following bands can be observed:  $700\text{ cm}^{-1}$ ,  $722\text{ cm}^{-1}$ ,  $728\text{ cm}^{-1}$ ,  $744\text{ cm}^{-1}$ ,  $761\text{ cm}^{-1}$ ,  $771\text{ cm}^{-1}$ ,  $791\text{ cm}^{-1}$  and  $815\text{ cm}^{-1}$ .

Bands in the  $720\text{--}735\text{ cm}^{-1}$  ring can be attributed to the 1,2 di-substituted aromatic rings [6]. In the dyad molecule, we observe a band on  $726\text{ cm}^{-1}$  region, which becomes split in two in the poly(Cbz-RhB), leading to the bands at  $722$  and  $728\text{ cm}^{-1}$ . The splitting of the band can be assigned to the presence of different environments, induced by steric hindrance due to polymerization of the monomer.

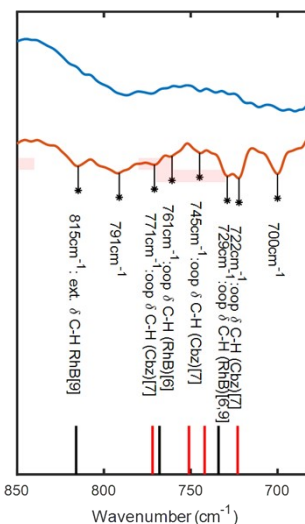

Figure S2.4. Focus on the  $700\text{--}850\text{ cm}^{-1}$  region, which contains modes commonly associated with out-of-plane C-H bending modes on aromatic compounds..

The band at  $740\text{--}760\text{ cm}^{-1}$ , are also consistent with out of plane CH bending on 1,2 di-substituted aromatic compounds.<sup>[6]</sup> In the crystalline form, a strong band is present at  $754\text{ cm}^{-1}$ , which gets largely perturbed in the poly(Cbz-RhB) layer. This observation suggests that the vibration is perturbed by polymerization, consistently with polymerization of Cbz moieties. Such modification is expected to generate 1,2,4 trisubstituted aromatic rings, whose characteristic  $\delta_{\text{OOP}}(\text{C-H})$  modes is expected in the  $760$  and  $780\text{ cm}^{-1}$ <sup>[6]</sup>. Indeed, two bands are observable at  $761$  and  $771\text{ cm}^{-1}$  on the polymerized region, further supporting

this assignment. A band at 815 cm<sup>-1</sup> is observed at poly(Cbz-RhB), analogous to a mode observed at 822 cm<sup>-1</sup> for the crystalline dyad. These modes are also consistent with 1,4-di substituted aromatic rings, and are observed at 816 for unsubstituted Rhodamines<sup>[2]</sup>. This supports the assignment of these modes to  $\delta_{oop}(\text{C-H})$  on the non xanthenic ring of RhB.

Based on this reasoning, the following tentative band assignment is proposed. Evidence supporting polymerization reaction are shown in bold:

| 700  | 706       | $\delta_{oop}(\text{C-H})$                  | RhB/Cbz | Characteristic frequency region of OOP bending in aromatic molecules <sup>[1,6]</sup> . Present both on the dyad and polymerized region.                                                                                                                                                                                                                                                      |
|------|-----------|---------------------------------------------|---------|-----------------------------------------------------------------------------------------------------------------------------------------------------------------------------------------------------------------------------------------------------------------------------------------------------------------------------------------------------------------------------------------------|
| 722  | 726       | $\delta_{oop}(\text{C-H})$                  | Cbz     | Bands are observed at 720 and 723 cm <sup>-1</sup> for solid carbazoles <sup>[4]</sup> , for Rhodamines at 734 cm <sup>-1</sup> <sup>[2]</sup> and at 726 for the crystalline dyad. Characteristic frequency region of 1,2- di-substituted aromatic rings. <sup>[6]</sup>                                                                                                                     |
| 728  | 726       | $\delta_{oop}(\text{C-H})$                  | Cbz     |                                                                                                                                                                                                                                                                                                                                                                                               |
| -    | 754       | $\delta_{oop}(\text{C-H})$                  | Cbz     | Consistent with 1,2- di-substituted aromatic rings <sup>[1,6]</sup> , observed for carbazoles at 740-742cm <sup>-1</sup> <sup>[4]</sup> .                                                                                                                                                                                                                                                     |
| 761  | -         | $\delta_{oop}(\text{C-H})$                  | Cbz     | <b>Characteristic frequency of out of planes C-H bending on 1,2,4 trisubstituted rings<sup>[1,6]</sup>. In monomeric samples, an analogous band is observed at 756 cm<sup>-1</sup> on carbazoles<sup>[4]</sup>, and for the dyad at 754 cm<sup>-1</sup> (characteristic of 1,2 di-substituted rings<sup>[6]</sup>), consistently with the polymerization reaction.</b>                        |
| 771  | -         | $\delta_{oop}(\text{C-H})$                  | Cbz     |                                                                                                                                                                                                                                                                                                                                                                                               |
| 815  | 822       | $\delta_{oop}(\text{C-H})$                  | RhB     | Observed for Rhodamine samples at 816 cm <sup>-1</sup> <sup>[2]</sup> and for the crystalline dyad at 822 cm <sup>-1</sup> . Consistent with 1,2 disubstituted rings such as the non-xanthenic RhB <sup>[6]</sup> .                                                                                                                                                                           |
| 1015 | 1011      | $\delta_{ip}(\text{C-H})$                   | Cbz/RhB | Consistent with C-H in plane vibration modes in aromatic compounds, notably in 1,2 disubstituted rings <sup>[1,6]</sup> . Observed for rhodamines at 1020cm <sup>-1</sup> and assigned to non-xanthenic C-H in plane bending modes <sup>[2]</sup> and at 1006, 1010 and 1022 cm <sup>-1</sup> in solid Cbz samples. <sup>[4]</sup> Observed at 1011 cm <sup>-1</sup> on the crystalline dyad. |
| 1042 | 1047      | $\delta_{ip}(\text{C-H})$                   | RhB     | Consistent with C-H in plane vibration modes in aromatic compounds <sup>[1,6]</sup> . Observed at 1047 cm <sup>-1</sup> in the crystalline dyad. Can alternatively be associated with 1020 cm <sup>-1</sup> external ring modes, which are not modified by polymerization.                                                                                                                    |
| 1076 | 1075      | $\delta_{ip}(\text{C-H})$                   | Cbz     | <b>Becomes very weak in the poly(Cbz-RhB).</b>                                                                                                                                                                                                                                                                                                                                                |
| -    | 1132      | $\delta_{ip}(\text{C-H})$                   | Cbz     | <b>Region characteristic of C-H in plane bending on 1,2 disubstituted aromatic rings<sup>[6]</sup>. Observed at 1136<sup>-1</sup> on solid Cbz<sup>[4]</sup>. Band only present in the monomeric dyad, and cannot be detected in the poly Cbz-RhB.</b>                                                                                                                                        |
| 1146 | 1156      | $\delta_{ip}(\text{C-H})^{ar}$              | Cbz     | Aromatic C-H in plane bending <sup>[1]</sup> . Band at 1136 cm <sup>-1</sup> observed on solid Cbz samples <sup>[4]</sup> .                                                                                                                                                                                                                                                                   |
| 1168 | 1180      | $\nu(\text{C-O})$                           | RhB     | Characteristic of C-O stretching frequencies on aliphatic esters (1163-1210 cm <sup>-1</sup> ) <sup>[1]</sup> An analogous band is observed at 1180 cm <sup>-1</sup> in the crystalline dyad.                                                                                                                                                                                                 |
| 1225 | 1246      | $\nu(\text{C-O})$                           | RhB     | Observed at 1242 on Rhodamines <sup>[2]</sup> , associated to stretching modes of the external ring. Has alternatively been assigned to the C-O stretching mode of Rhodamines.                                                                                                                                                                                                                |
| 1260 | 1272      | $\nu(\text{C-N})$ or $\nu_{xr}(\text{C-O})$ | Cbz/RhB | Band at 1270 cm <sup>-1</sup> observed on solid Cbz <sup>[4]</sup> and alternatively can be assigned to C-O stretching of the xanthenic ring, as it has been observed at 1269 cm <sup>-1</sup> on solid Rhodamines <sup>[2]</sup>                                                                                                                                                             |
| 1308 | 1320-1358 | $\nu(\text{C-N})$                           | RhB     | Region characteristic of C-N stretching in tertiary aromatic amines <sup>[1]</sup> . Observed at 1305cm <sup>-1</sup> in solid Rhodamine 6G <sup>[2]</sup> . Although compatible with C-N stretching, this band has also been assigned in literature to C-H deformation <sup>[2]</sup>                                                                                                        |
| 1379 | 1380      | $\nu_s(\text{C=N/C=C})$ ring def.           | Cbz     | Observed for carbazoles and for the monomeric dyad at 1380 cm <sup>-1</sup> <sup>[4]</sup> Analogous to pyrrole mode at 1384 cm <sup>-1</sup> <sup>[5]</sup>                                                                                                                                                                                                                                  |
| 1454 | 1453      | $\nu(\text{C=N})$                           | Cbz     | Observed for carbazoles at 1452cm <sup>-1</sup> <sup>[4]</sup>                                                                                                                                                                                                                                                                                                                                |
| 1465 | 1463      | $\delta_{scissoring}(\text{CH}_2)$          | RhB     | Characteristic frequency for C-H scissoring bending modes in aliphatic CH <sub>2</sub> groups <sup>[1]</sup> . Can alternatively be assigned to C=C stretching. <sup>[1,6]</sup> Observed for solid Rhodamine solid samples at 1463 cm <sup>-1</sup> . <sup>[2]</sup>                                                                                                                         |
| 1493 | 1493      | $\nu(\text{C=C})^{ar}$ ring def.            | Cbz     | Characteristic C=C stretching in aromatic moieties <sup>[1]</sup> . Observed for Carbazoles at 1490 cm <sup>-1</sup> <sup>[3,4]</sup>                                                                                                                                                                                                                                                         |

|      |      |                                   |         |                                                                                                                                                                                              |
|------|------|-----------------------------------|---------|----------------------------------------------------------------------------------------------------------------------------------------------------------------------------------------------|
| 1522 | 1530 | $\nu_{as}(C=N/C=C)$ ring. Def.    | Cbz     | Observed for carbazoles in the 1520-1540 $\text{cm}^{-1}$ range [3,4], Analogous to pyrrole assymmetric deformation mode at 1530 $\text{cm}^{-1}$ [5]                                        |
| 1557 | 1554 | $\nu(C=C)^{ar}$ Xanthene ring def | RhB     | Observed at Rhodamines at 1563 $\text{cm}^{-1}$ [2]. Attributed to deformation modes of the xanthene ring [2], analogous to similar modes present in anthracene at 1550 $\text{cm}^{-1}$ [6] |
| 1580 | 1587 | $\nu(C=C)^{ar}$                   | RhB/Cbz | Aromatic C=C stretching group frequencies [1,6] bands in this position are usually observed for six-membered rings on which conjugation is extended [6].                                     |
| 1594 | 1587 | $\nu(C=C)^{ar}$                   | RhB     | Aromatic C=C stretching group frequency [1,6]                                                                                                                                                |
| 1607 | 1587 | $\nu(C=C)^{ar}$                   | Cbz/RhB | 1606 $\text{cm}^{-1}$ observed at Rhodamine 6G [2] can alternatively also be associated with Cbz band observed at 1620 $\text{cm}^{-1}$ [4]                                                  |
| 1641 | 1646 | $\nu(C=C)^{ar}$ Xanthene Ring def | RhB     | Observed for Rhodamines at 1649 $\text{cm}^{-1}$ [2] Analogous to anthracene mode at 1620-1640 $\text{cm}^{-1}$ [6]                                                                          |
| 1729 | 1720 | $\nu(C=O)$                        | RhB     | Group frequency on the 1700-1800 region [1].                                                                                                                                                 |
| 1747 | 1720 | $\nu(C=O)$                        | RhB     | Band observed at 1718 $\text{cm}^{-1}$ on solid Rhodamine 6G [2] and at 1720 $\text{cm}^{-1}$ on the crystalline dyad.                                                                       |

## References

- [1] Hermann, C.K.F.; Morrill, C.; Shriner R.L.; Fuson R.C. "Ch. 2 Infrared Spectroscopy " in "The systematic identification of organic compounds" Wiley 8<sup>th</sup> Edition.
- [2] Lajoube M. and Henry, M. "Fourier transform raman and infrared and surface enhanced Raman spectra for rhodamine 6G." Spectrochimica Acta A 47, 9/10, 1459-1466 (1991).
- [3] Jana S, Trivedi MK, Branton A, Trivedi D, Nayak G, et al. (2015) Physical and Structural Characterization of Biofield Energy Treated Carbazole. Pharm Anal Acta 6: 435. doi:10.4172/21532435.1000435
- [4] Vibrational assignment of carbazole from Infrared Raman and Fluorescence Spectra J. Chem Phys 49 3344 (1968)
- [5] Katritzky A.R., "The infrared spectra of heteroaromatic compounds" Q. Rev. Chem. Soc., 13, 353-373 (1959).
- [6] Socrates G. "Infrared and Raman Characteristic Group Frequencies: Tables and Charts" 3<sup>rd</sup> ed. Wiley

## Section S3) Fluorescence images of photografted patterns

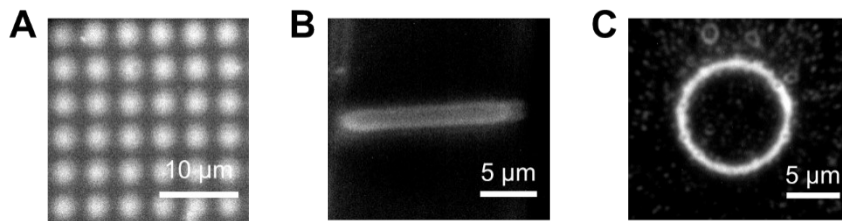

Figure S3.1 Fluorescence image of different surface patterns obtained by photopolymerizing Cbz-RhB dyad into poly carbazole rhodamine layers. (A) Grid pattern, used to collect the IR data discussed in Sect. S2. (B) Wire pattern connecting two gold electrodes (AFM image reported on Fig. 5B). (C) Circle pattern, as reported in Fig. 4D. For all images  $\lambda_{exc} = 560$  nm, with exposition times on the 100 ms range.

The stability of the fluorescence emission of polymerized layers is evaluated by monitoring the intensity of the emission of the grid pattern (Fig.S3.1 A) over time, under illumination density of 50 W/cm<sup>2</sup> ( $\lambda_{exc} = 474$  nm, 40MHz).

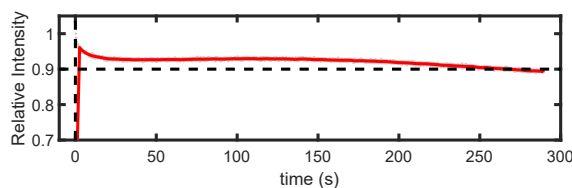

Figure S3.2 Monitoring of the fluorescence emission of the pattern shown in Fig.S3.1A.

## Section S4) Routine for trajectory preparation in direct laser writing

Trajectories for direct laser writing experiments were calculated based on control points provided by the user with the routine described in this section. The original control points are first interpolated with 3<sup>rd</sup> order spline functions. An iterative procedure is then put in place to homogenize the distance between control points on which each trajectory is reinterpolated, over a number of new control points which is proportional to the distance between the original control points. After a few (typ.3-4) iterations, the distance between neighbouring points converges towards a fixed value, ensuring that a homogeneous velocity during the whole operation.

## Section S5) Influence of speed on patterns thickness and height

In this section, we report the influence of the piezo displacement speed on the properties of the resulting lines. This data is obtained by extracting a large number (N=30) of profiles from the AFM images shown in Figs.4B and 4C of the main text, and fitting each profile with a gaussian function

$$F(x) = He^{-\left(\frac{(x-\mu)}{2\sigma}\right)^2}$$

The amplitude  $H$  of the gaussian is used as the height, while the dispersion  $\sigma$  is used to evaluate the full width at half maximum  $\text{FWHM} = 2\sigma (\ln(2))^{0.5}$ . This procedure leads to the data indicated in the figure S4

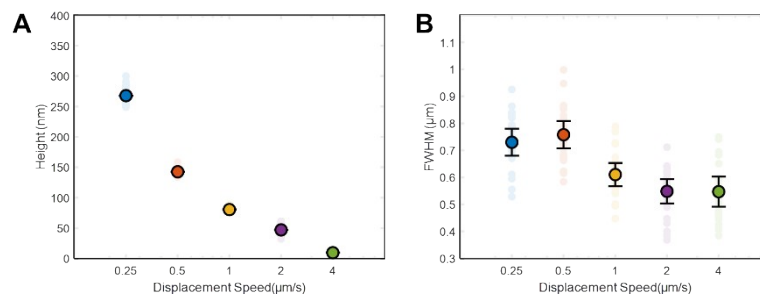

Figure S5.1 Influence of the piezo displacement speed on the lines (A) Height and (B) width. This analysis is performed on the data shown in fig 4 of the main text.
